# Supplementary material for: Exploratory analyses of consensus molecular subtype-dependent associations of TP53 mutations with immunomodulation and prognosis in colorectal cancer
Source: PubMed Central journal article supplement — ESMO Open. 2019 Jun 24;4(3):e000523. doi: 10.1136/esmoopen-2019-000523 (PMC6598553; doi:10.1136/esmoopen-2019-000523), 2019-06-24

## Supplementary Table S1. *TP53* mutation spectrum in consensus molecular subtypes (CMS) of colorectal cancer

A *TP53* mutation rate and spectrum in consensus molecular subtypes (CMS) of colorectal cancer among patients from the in-house series.

|                                      | Total    | CMS1    | CMS2     | CMS3    | CMS4    | <i>P</i> value <sup>a</sup> |
|--------------------------------------|----------|---------|----------|---------|---------|-----------------------------|
| <b>Mutation rate</b>                 |          |         |          |         |         |                             |
| <i>TP53</i> wt                       | 124 (39) | 44 (71) | 29 (21)  | 29 (54) | 22 (35) | <b>&lt;0.001</b>            |
| <i>TP53</i> mut                      | 192 (61) | 18 (29) | 109 (79) | 25 (46) | 40 (65) |                             |
| <b>TOTAL:</b>                        | 316      | 62      | 138      | 54      | 62      |                             |
| <b>Type of mutation</b>              |          |         |          |         |         |                             |
| Missense                             | 128 (67) | 15 (83) | 68 (62)  | 17 (68) | 28 (70) | 0.578                       |
| Nonsense                             | 20 (10)  | 0       | 16 (15)  | 1 (4)   | 3 (8)   |                             |
| Frameshift                           | 27 (14)  | 2 (11)  | 15 (14)  | 3 (12)  | 7 (18)  |                             |
| Indel, in-frame                      | 1 (1)    | 0       | 1 (1)    | 0       | 0       |                             |
| Silent                               | 3 (2)    | 0       | 1 (1)    | 2 (8)   | 0       |                             |
| Splice                               | 13 (7)   | 1 (6)   | 8 (7)    | 2 (8)   | 2 (5)   |                             |
| <b>TOTAL:</b>                        | 192      | 18      | 109      | 25      | 40      |                             |
| <b>Functional domain<sup>b</sup></b> |          |         |          |         |         |                             |
| TAD 1/2:                             | 5 (3)    | 0       | 0        | 0       | 5 (13)  | <b>0.001</b>                |
| Proline-rich:                        | 2 (1)    | 1 (6)   | 0        | 0       | 1 (3)   |                             |
| DBD:                                 | 166 (93) | 15 (88) | 97 (96)  | 22 (96) | 32 (84) |                             |
| NLS:                                 | 1 (1)    | 0       | 0        | 1 (4)   | 0       |                             |
| OD:                                  | 3 (2)    | 0       | 3 (3)    | 0       | 0       |                             |
| Neg:                                 | 1 (1)    | 1 (6)   | 0        | 0       | 0       |                             |
| NA:                                  | 1 (1)    | 0       | 1 (1)    | 0       | 0       |                             |
| <b>TOTAL:</b>                        | 179      | 17      | 101      | 23      | 38      |                             |

<sup>a</sup> Fisher's exact test. Significant *P* values in bold.

<sup>b</sup> Excludes splice mutations, as the functional domains are defined according to codon numbers

B *TP53* mutation rate in CMS subtypes, MSS tumors only.

|                                     | Total    | CMS1    | CMS2     | CMS3    | CMS4    | <i>P</i> value <sup>a</sup> |
|-------------------------------------|----------|---------|----------|---------|---------|-----------------------------|
| <b>Mutation rate</b> <i>TP53</i> wt | 72 (29)  | 6 (38)  | 29 (22)  | 18 (44) | 19 (32) | <b>&lt;0.026</b>            |
| <i>TP53</i> mut                     | 179 (71) | 10 (63) | 106 (79) | 23 (56) | 40 (68) |                             |
| <b>TOTAL:</b>                       | 251      | 16      | 135      | 41      | 59      |                             |

<sup>a</sup> Fisher's exact test

## Supplementary Table S2. Gene Set Enrichment Analysis in *TP53* wild-type and mutated tumors according to consensus molecular subtype.

Results from gene set enrichment analysis using the 50 "hallmark gene sets" from the Molecular Signatures Database (MSigDB 5.2)[1] and performed by the camera R package [2]. *TP53* wild-type tumors were compared with mutated tumors in the four CMS subgroups separately. Analysis performed on 316 tumor samples from the in-house series. Only gene sets displaying significant over- or under-enrichment, as measured by FDR (significance threshold <0.05), are shown here. No significant gene set enrichment between *TP53* wild-type and mutated tumors was found within CMS2. Gene sets are ranked according to adjusted P-values (i.e. FDR-values) with the most significant first.

### CMS1

| Gene set                  | Genes (N) | Direction <sup>a</sup> | P value  | FDR      |
|---------------------------|-----------|------------------------|----------|----------|
| ALLOGRAFT_REJECTION       | 192       | Down                   | 4.41E-13 | 2.20E-11 |
| INTERFERON_GAMMA_RESPONSE | 186       | Down                   | 2.68E-12 | 6.70E-11 |
| INTERFERON_ALPHA_RESPONSE | 91        | Down                   | 1.01E-07 | 1.68E-06 |
| OXIDATIVE_PHOSPHORYLATION | 184       | Down                   | 1.37E-07 | 1.71E-06 |
| E2F_TARGETS               | 192       | Down                   | 1.37E-06 | 1.37E-05 |
| G2M_CHECKPOINT            | 189       | Down                   | 5.76E-06 | 4.80E-05 |
| KRAS_SIGNALING_DN         | 182       | Up                     | 1.11E-04 | 7.90E-04 |
| IL6_JAK_STAT3_SIGNALING   | 82        | Down                   | 5.27E-04 | 3.29E-03 |
| INFLAMMATORY_RESPONSE     | 197       | Down                   | 6.67E-04 | 3.70E-03 |
| MITOTIC_SPINDLE           | 193       | Down                   | 1.09E-03 | 5.35E-03 |
| COMPLEMENT                | 188       | Down                   | 1.28E-03 | 5.35E-03 |
| MYC_TARGETS_V1            | 183       | Down                   | 1.25E-03 | 5.35E-03 |
| MTORC1_SIGNALING          | 191       | Down                   | 1.90E-03 | 7.30E-03 |
| ADIPOGENESIS              | 187       | Down                   | 2.61E-03 | 9.32E-03 |
| IL2_STAT5_SIGNALING       | 192       | Down                   | 5.90E-03 | 1.97E-02 |
| HEDGEHOG_SIGNALING        | 34        | Up                     | 6.85E-03 | 2.14E-02 |
| MYOGENESIS                | 192       | Up                     | 9.82E-03 | 2.73E-02 |
| UNFOLDED_PROTEIN_RESPONSE | 106       | Down                   | 9.33E-03 | 2.73E-02 |
| PANCREAS_BETA_CELLS       | 40        | Up                     | 1.20E-02 | 3.17E-02 |
| APOPTOSIS                 | 157       | Down                   | 1.72E-02 | 4.29E-02 |

### CMS3

| Gene set                  | Genes (N) | Direction | P value | FDR     |
|---------------------------|-----------|-----------|---------|---------|
| MTORC1_SIGNALING          | 191       | Down      | 5.6E-07 | 2.8E-05 |
| MYC_TARGETS_V1            | 183       | Down      | 8.7E-04 | 2.1E-02 |
| GLYCOLYSIS                | 192       | Down      | 1.3E-03 | 2.1E-02 |
| INTERFERON_ALPHA_RESPONSE | 91        | Down      | 2.4E-03 | 2.9E-02 |
| INTERFERON_GAMMA_RESPONSE | 186       | Down      | 5.1E-03 | 4.2E-02 |
| UNFOLDED_PROTEIN_RESPONSE | 106       | Down      | 4.4E-03 | 4.2E-02 |
| PROTEIN_SECRETION         | 93        | Down      | 6.8E-03 | 4.9E-02 |

**CMS4**

| <b>Gene set</b>                   | <b>Genes (N)</b> | <b>Direction</b> | <b>P value</b> | <b>FDR</b> |
|-----------------------------------|------------------|------------------|----------------|------------|
| E2F_TARGETS                       | 192              | Up               | 1.69E-23       | 8.46E-22   |
| G2M_CHECKPOINT                    | 189              | Up               | 1.25E-18       | 3.13E-17   |
| MYC_TARGETS_V1                    | 183              | Up               | 8.46E-17       | 1.41E-15   |
| MYC_TARGETS_V2                    | 54               | Up               | 9.05E-12       | 1.13E-10   |
| EPITHELIAL_MESENCHYMAL_TRANSITION | 195              | Down             | 3.15E-11       | 3.15E-10   |
| TNFA_SIGNALING_VIA_NFKB           | 193              | Down             | 4.93E-09       | 4.11E-08   |
| ALLOGRAFT_REJECTION               | 192              | Down             | 1.47E-07       | 1.05E-06   |
| INFLAMMATORY_RESPONSE             | 197              | Down             | 2.35E-07       | 1.47E-06   |
| DNA_REPAIR                        | 136              | Up               | 6.02E-05       | 3.34E-04   |
| MITOTIC_SPINDLE                   | 193              | Up               | 6.82E-05       | 3.41E-04   |
| OXIDATIVE_PHOSPHORYLATION         | 184              | Up               | 7.76E-05       | 3.53E-04   |
| COMPLEMENT                        | 188              | Down             | 1.92E-04       | 8.01E-04   |
| KRAS_SIGNALING_DN                 | 182              | Down             | 3.38E-04       | 1.30E-03   |
| IL6_JAK_STAT3_SIGNALING           | 82               | Down             | 6.10E-04       | 2.18E-03   |
| HYPOXIA                           | 188              | Down             | 1.46E-03       | 4.58E-03   |
| MYOGENESIS                        | 192              | Down             | 1.40E-03       | 4.58E-03   |
| COAGULATION                       | 131              | Down             | 2.38E-03       | 7.00E-03   |
| INTERFERON_GAMMA_RESPONSE         | 186              | Down             | 3.29E-03       | 8.67E-03   |
| IL2_STAT5_SIGNALING               | 192              | Down             | 3.21E-03       | 8.67E-03   |
| KRAS_SIGNALING_UP                 | 187              | Down             | 4.30E-03       | 1.08E-02   |
| MTORC1_SIGNALING                  | 191              | Up               | 4.76E-03       | 1.13E-02   |
| ANGIOGENESIS                      | 33               | Down             | 5.49E-03       | 1.25E-02   |
| ADIPOGENESIS                      | 187              | Up               | 1.27E-02       | 2.76E-02   |
| APOPTOSIS                         | 157              | Down             | 2.30E-02       | 4.80E-02   |

### Supplementary Table S3. Immune cell infiltration according to *TP53* mutation status within MSS and MSI tumors

Comparison of differences in abundance of ten different immune and stromal cell populations between *TP53* wild-type and mutated tumors in MSS and MSI tumors. Analysis performed on 316 patients with confident CMS classification from the in-house series.

| Cell population         | MSS (N=251)                  |                      | MSI (N=60)                   |                      |
|-------------------------|------------------------------|----------------------|------------------------------|----------------------|
|                         | Mean difference <sup>a</sup> | P value <sup>b</sup> | Mean difference <sup>a</sup> | P value <sup>b</sup> |
| T cells                 | 0.111                        | 0.64                 | 0.337                        | 0.96                 |
| CD8 T cells             | 0.096                        | 0.22                 | 0.056                        | 1.0                  |
| Cytotoxic lymphocytes   | 0.136                        | 0.34                 | 0.48                         | 0.1                  |
| NK cells                | 0.117                        | <b>0.007</b>         | 0.143                        | 1.0                  |
| B lineage               | 0.109                        | 1.0                  | 0.162                        | 1.0                  |
| Monocytic lineage       | 0.154                        | 1.0                  | 0.56                         | 0.52                 |
| Myeloid dendritic cells | 0.101                        | 0.7                  | 0.188                        | 1.0                  |
| Neutrophils             | 0.143                        | <b>0.048</b>         | 0.116                        | 1.0                  |
| Endothelial cells       | -0.008                       | 1.0                  | 0.002                        | 1.0                  |
| Fibroblasts             | 0.153                        | 1.0                  | 0.319                        | 1.0                  |

<sup>a</sup>Difference in abundances of relevant cell population between *TP53* wild-type and mutated tumors, as measured by the MCP-counter method.

<sup>b</sup>Independent samples T-test. P values have been multiplied by 20 to account for multiple hypotheses testing according to Bonferroni.

### Supplementary Table S4. Immune cell infiltration quantified by multiplex immunohistochemistry according to *TP53* mutation status within the consensus molecular subtypes

Comparison of differences in abundance of CD3+, CD8+ and CD56+ (NK cells) cells between *TP53* wild-type and mutated tumors in CMS1-4. Analysis performed on 230 patients with confident CMS classification and multiplex immunohistochemistry-based quantification of immune cells from the in-house series.

| Cell population | CMS1 (N=45)                  |                      | CMS2 (N=103)    |         | CMS3 (N=39)     |         | CMS4 (N=43)     |         |
|-----------------|------------------------------|----------------------|-----------------|---------|-----------------|---------|-----------------|---------|
|                 | Mean difference <sup>a</sup> | P value <sup>b</sup> | Mean difference | P value | Mean difference | P value | Mean difference | P value |
| CD8+ cells      | 0.088                        | <b>0.012</b>         | -0.007          | 1.0     | 0.021           | 1.0     | 0.007           | 1.0     |
| CD3+ cells      | 0.07                         | 1.0                  | 0.002           | 1.0     | 0.019           | 1.0     | 0.006           | 1.0     |
| CD56+ cells     | 0.004                        | 1.0                  | 0.005           | 1.0     | 0.011           | 1.0     | -0.001          | 1.0     |

<sup>a</sup> Cell positivity fraction for each cell population was calculated for each sample by dividing the number of cells staining for the relevant marker by the total number of cells in the sample. This yields a number between 0 and 1, representing the fraction of relevant immune cell to all cells.

<sup>b</sup>Difference in abundances of relevant cell population between *TP53* wild-type and mutated tumors, as measured by multiplex immunohistochemistry.

<sup>c</sup>Independent samples T-test. P values have been multiplied by 12 to account for multiple hypotheses testing according to Bonferroni.

### Supplementary Table S5. Enrichment of metastatic disease in *TP53* mutated MSS tumors in CMS1

Comparison of the frequency of metastatic disease according to *TP53* mutation status in different strata. Analysis performed on patients with relevant molecular characteristics from the combined patient cohorts.

| Molecular characteristic | <i>N</i> | Number of patients with metastatic disease (%) | <i>P</i>     |
|--------------------------|----------|------------------------------------------------|--------------|
| <b>MSS CMS1</b>          |          |                                                |              |
| <i>TP53</i> mut          | 18       | 7 (39)                                         | <b>0.009</b> |
| <i>TP53</i> wild-type    | 15       | 0                                              |              |
| <b>MSI CMS1</b>          |          |                                                |              |
| <i>TP53</i> mut          | 13       | 0                                              | 1            |
| <i>TP53</i> wild-type    | 58       | 3 (5)                                          |              |
| <b>MSS CMS2-4</b>        |          |                                                |              |
| <i>TP53</i> mut          | 319      | 37 (12)                                        | 0.572        |
| <i>TP53</i> wild-type    | 180      | 24 (13)                                        |              |
| <b>MSI CMS2-4</b>        |          |                                                |              |
| <i>TP53</i> mut          | 4        | 1 (25)                                         | 0.324        |
| <i>TP53</i> wild-type    | 19       | 1 (5)                                          |              |

<sup>a</sup> Fisher's exact test

## Supplementary Figure S1. Immune cell infiltration according to *TP53* mutation status according to CMS classification and MSI status

### MSS

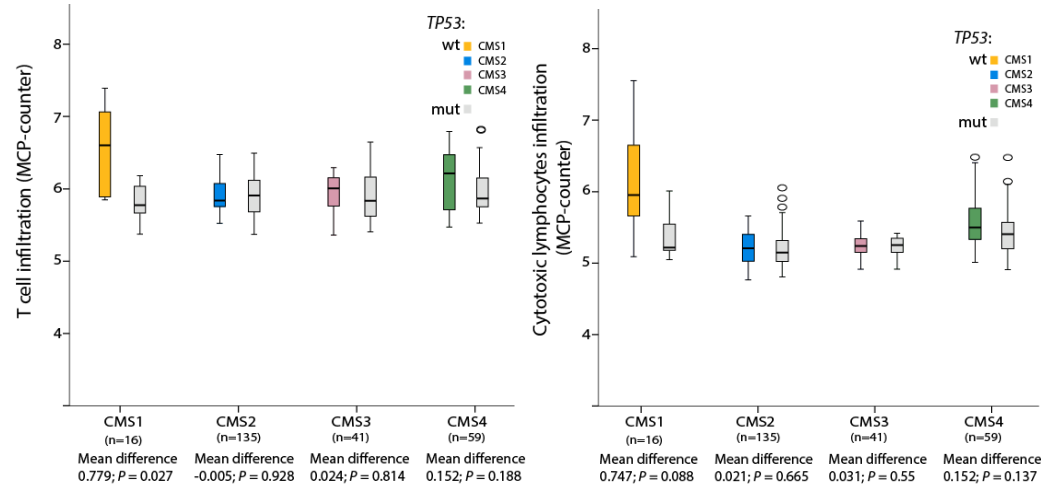

### MSI

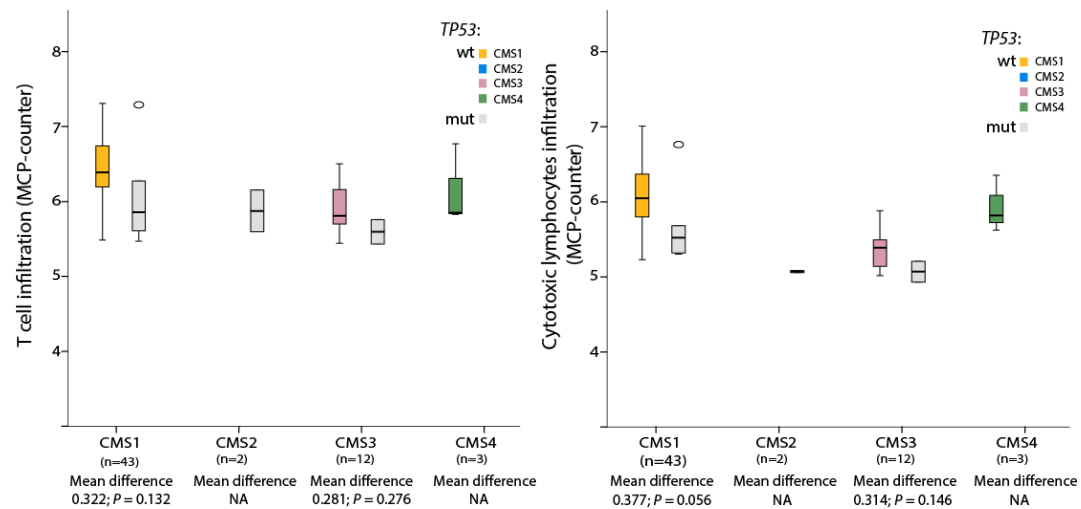

Comparison of differences in abundance of T cells and cytotoxic lymphocytes in *TP53* wild-type and mutated tumors in CMS1-4 according to MSI status. Abundances of the various cell populations are estimated by applying the MCP-counter method on gene expression data. Analysis performed on 316 patients with confident CMS classification from the in-house series. Unadjusted p-values from independent samples T-test.

## Supplementary Figure S2. Prognostic impact of *TP53* mutations according to the consensus molecular subtype in the independent patient series

Kaplan-Meier survival curves showing 5 year overall survival (OS) according to *TP53* mutation status within the consensus molecular subtypes in the A) in-house (Oslo) series and B) the French multicentre cohort.

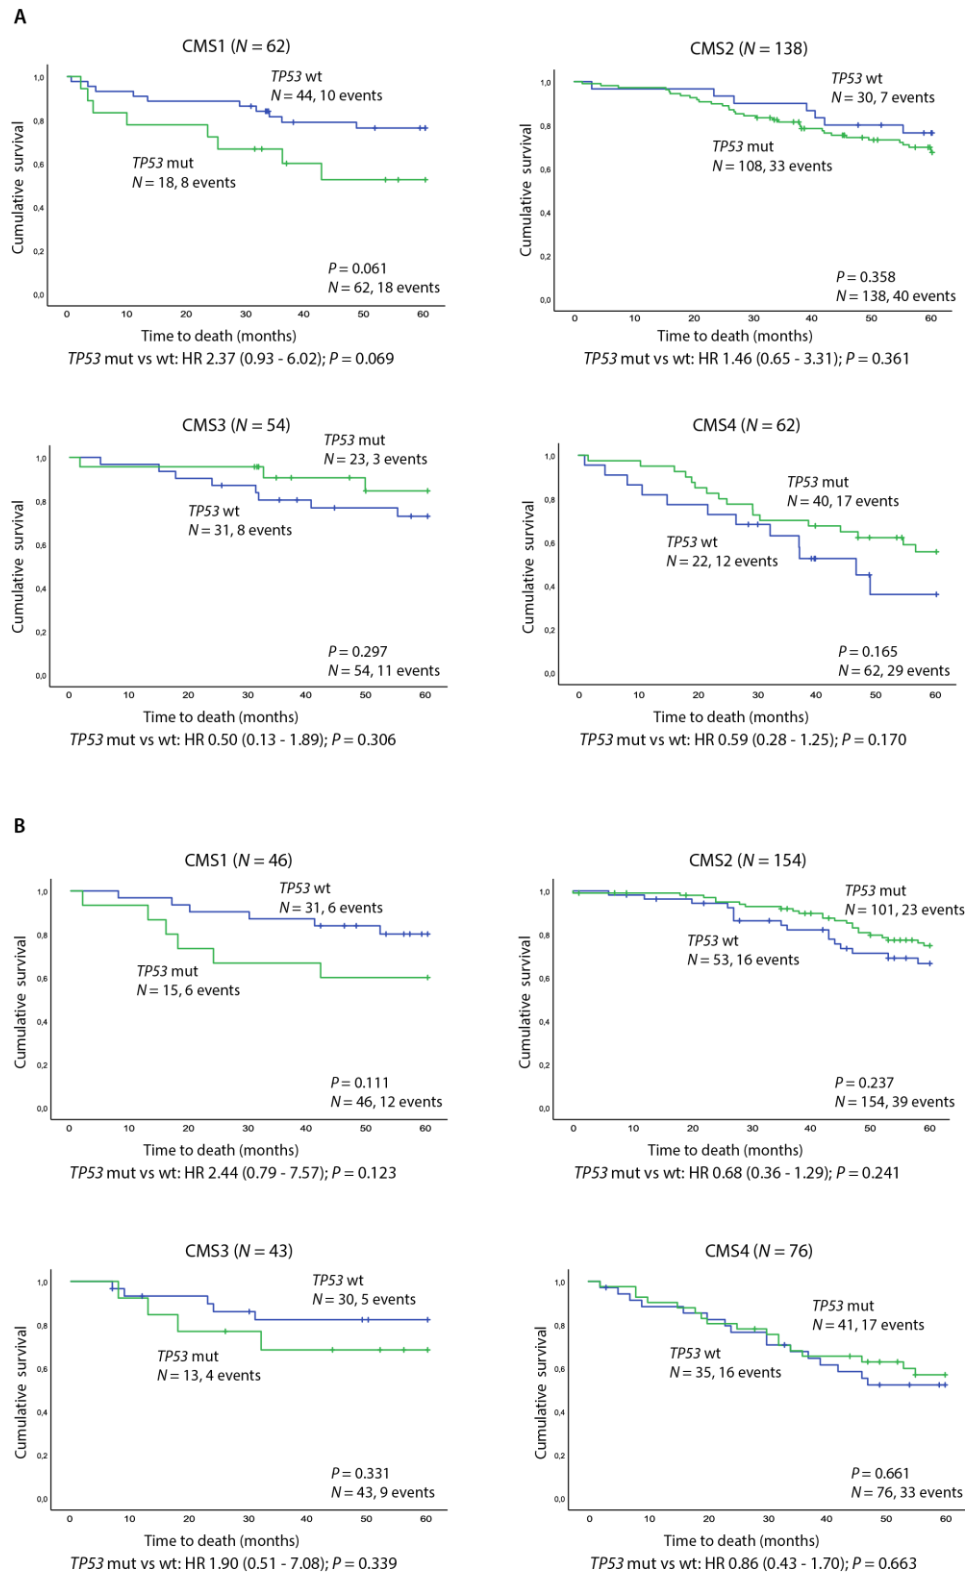

### Supplementary Figure S3. Prognostic impact of *TP53* mutations in CMS1 stratified according to MSI status in the independent patient series

Kaplan-Meier survival curves comparing *TP53* wild-type and mutated tumors according to MSI status in patients with CMS1 tumors A) in-house (Oslo) series and B) the French multicentre cohort.

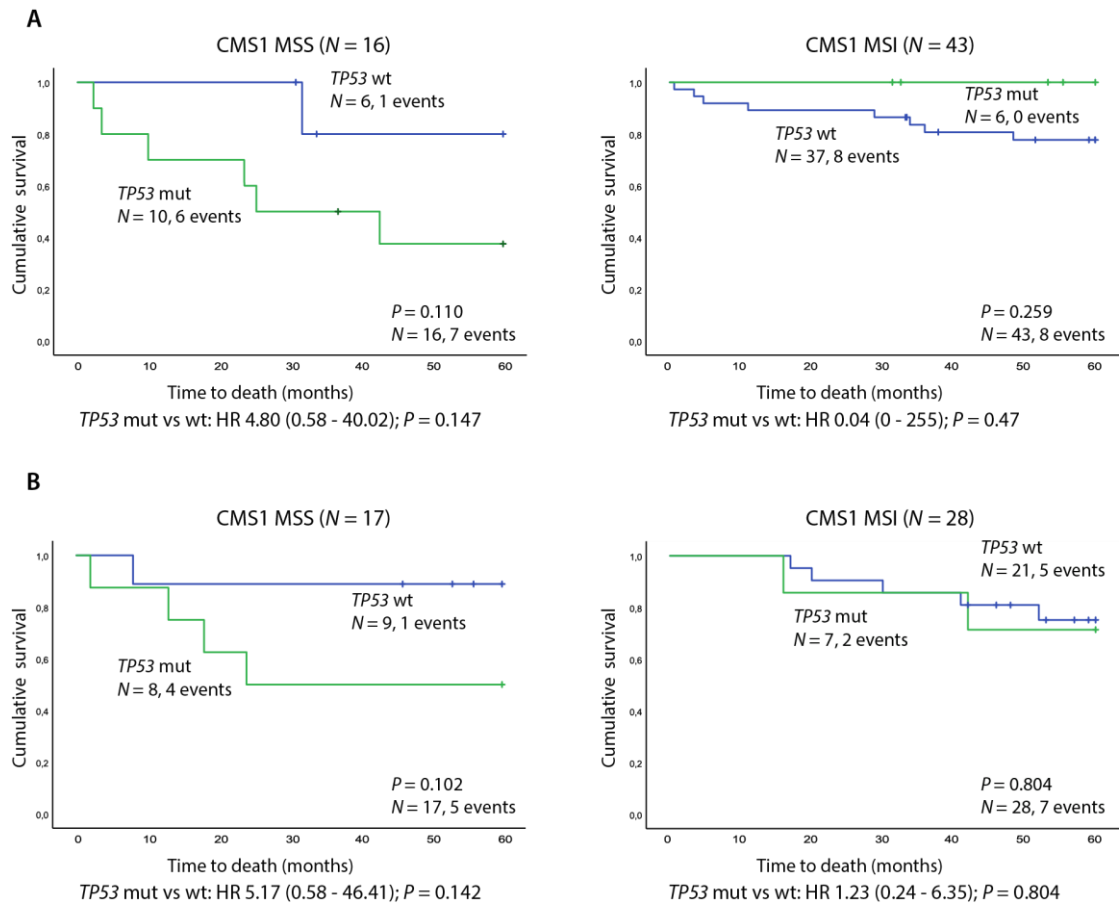



### Supplementary Figure S4. Prognostic impact of *TP53* mutations in CMS1 MSS tumors according disease stage

Kaplan-Meier survival curves showing 5 year overall survival (OS) according to *TP53* mutation status in CMS1 MSS tumors, stratified into stage I-III and stage IV disease. Analysis performed on patients with the relevant molecular characteristics in the combined patient cohorts.

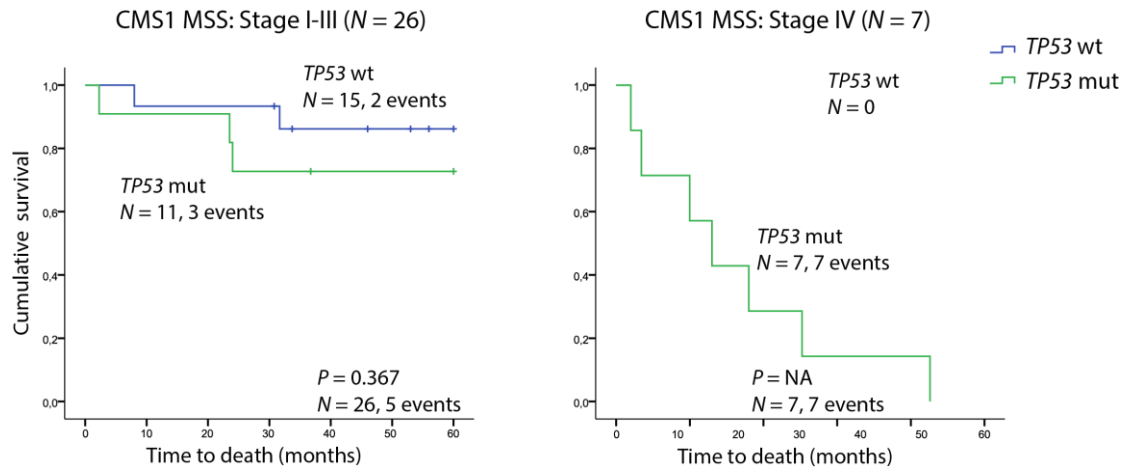

Supplement: esmoopen-2019-000523supp001.pdf [file esmoopen-2019-000523supp001.pdf]
